# Supplementary material for: An alkali-resistant zirconium-biligand organic framework with dual-metal centers for highly selective capture of phosphopeptides
Source: Royal Society of Chemistry journal article supplement (doi:10.1039/d2an01604d), 2022-11-24
Supplement: d2an01604d2.xlsx [file d2an01604d2.xlsx]

## Sheet: parallel test 1
Proteins	Sequence	Modifications	Oxidation (M) site IDs	Phospho (STY) site IDs
sp|Q8NH40|OR6S1_HUMAN	ADTRLQTPMYFFLGNLSCLEILLTSVIIPK	4 Phospho (STY)		123;248;249;300
sp|O95466|FMNL1_HUMAN	AGSVSLDSVLADVRSLQR	2 Phospho (STY)		29;30
sp|Q9P2S5|WRP73_HUMAN	ANPKIGIGMLAFSPDSYFLATRNDNIPNAVWVWDIQK	Oxidation (M);Phospho (STY)	42	154
sp|Q13085|ACACA_HUMAN;sp|O00763|ACACB_HUMAN	ASEGGGGKGIRK	Phospho (STY)		12
sp|O75161|NPHP4_HUMAN	ASMVLLQSSGFPEILDANK	Oxidation (M);2 Phospho (STY)	6	22;23
sp|Q8WZ42|TITIN_HUMAN	ATSYTITGLTENQEYK	3 Phospho (STY)		124;253;254;255;302
sp|A6NHJ4|ZN860_HUMAN	CDDFDEAFSQASSYAKQR	3 Phospho (STY)		3;4;280
sp|Q9UK11|ZN223_HUMAN	CKQSFSDMSIFDLPQQIRSAEK	Oxidation (M);2 Phospho (STY)	44	160;161
sp|P06748|NPM_HUMAN	DELHIVEAEAMNYEGSPIK	Phospho (STY)		37
sp|Q8N427|TXND3_HUMAN	DFYKDLLEMLSVGPSMVMILTKWNAVAEWR	2 Oxidation (M);2 Phospho (STY)	28;29	118;244
sp|Q8TCX1|DC2L1_HUMAN	DIKDPARDPQYAENEVDEMR	Oxidation (M);Phospho (STY)	34	301
sp|Q9Y608|LRRF2_HUMAN	DRSSRLSSLNHSYSHSHGMK	Oxidation (M);3 Phospho (STY)	49	170;171;172
sp|Q5R372|RBG1L_HUMAN	DTGGDGQESLYKICK	Phospho (STY)		228
sp|P30307|MPIP3_HUMAN	DTSFTVCPDVPRTPVGKFLGDSANLSILSGGTPK	3 Phospho (STY)		46;205;206
sp|Q17R98|ZN827_HUMAN	EEPMEVDIQDSHVSISPSRNVGYSTLIGREK	2 Phospho (STY)		58;59;60
sp|A6PVY3|F177B_HUMAN	EEQSTNSTLDPSKLSWGPYLRFWAGR	3 Phospho (STY)		5;6;281
sp|Q9HCS5|E41LA_HUMAN	EIPYTKIETQGDPIR	2 Phospho (STY)		269
sp|Q5XG87|PAPD7_HUMAN	ENKASTYGLNYLLSGSR	3 Phospho (STY)		79;80;296
sp|P07900|HS90A_HUMAN	ESEDKPEIEDVGSDEEEEK	Phospho (STY)		38
sp|Q9HAU5|RENT2_HUMAN	EYFTSLTKHLK	Phospho (STY)		308
sp|O75976|CBPD_HUMAN	FANEYPNITRLYSLGK	2 Phospho (STY)		27;284
sp|Q8IVW6|ARI3B_HUMAN	FPILGLGSSSGTNTSSPR	Phospho (STY)		105
sp|Q9C0A6|SETD5_HUMAN	FSPSHSSMSHLEAVSPSDSRGTSSSHCRPQENISSR	Oxidation (M);5 Phospho (STY)	38	132;133;134;135;136;137;262
sp|Q9Y664|KPTN_HUMAN	FSSQSNVYGLAGGAGGR	2 Phospho (STY)		173;314
sp|P35443|TSP4_HUMAN	FYEGSELVADSGVTIDTTMR	5 Phospho (STY)		47;208;209;210;287
sp|Q709C8|VP13C_HUMAN	GEPLHIINSSNVTDEPLLK	Phospho (STY)		92
sp|O75564|JERKY_HUMAN	GESRKALMQEYNVGMSTLYDIR	Oxidation (M);2 Phospho (STY)	7	24;283
sp|Q9NY15|STAB1_HUMAN	GFFGPDCTQCPGGFSNPCYGKGNCSDGIQGNGACLCFPDYK	2 Phospho (STY)		150;310
sp|O43374|RASL2_HUMAN;sp|C9J798|RAS4B_HUMAN	GFSGWAHLTEVDPDEEVQGEIHLRLEVWPGARACR	2 Phospho (STY)		11;183
sp|Q6ZRQ5|MMS22_HUMAN	GLANTMKSPLSMLEMVK	3 Phospho (STY)		86;87;237
sp|Q502W6|VWA3B_HUMAN	GPWGLSDQKVQKK	Phospho (STY)		65
sp|Q13237|KGP2_HUMAN	GSFDEPTSKFCVACVTEAFDYLHRLGIIYR	2 Phospho (STY)		291;292
sp|Q8IY26|PLPP6_HUMAN	GSFPLAAAGPSQSPAPPLPEEDRMDLNPSFLGIALR	3 Phospho (STY)		107;108;109
sp|Q6ZTR5|CFA47_HUMAN	GSLTINVHRGSLAMSIQR	Oxidation (M);3 Phospho (STY)	25	90;91;238
sp|Q17RW2|COOA1_HUMAN	GSVGPVGPIGPAGIPGPMGLSGNKGLPGIK	Phospho (STY)		61
sp|Q9H9S3|S61A2_HUMAN;sp|P61619|S61A1_HUMAN	GTLMELGISPIVTSGLIMQLLAGAKIIEVGDTPK	3 Phospho (STY)		51;217;218
sp|Q9Y3Q8|T22D4_HUMAN	GTPRNGSPPPGAPSSR	2 Phospho (STY)		168;169
sp|B6A8C7|TARM1_HUMAN	GTVTAGGRVTLQCQK	2 Phospho (STY)		181;182
sp|Q8NEB5|PLPP5_HUMAN	HHWQDVLVGSMIGMTFAYVCYRQYYPPLTDAECHK	Phospho (STY)		246
sp|Q8NDP4|ZN439_HUMAN	HMVVHSGDGPYKCKFCGK	Oxidation (M);Phospho (STY)	31	122
sp|Q9H6U8|ALG9_HUMAN	HRWKSFFHWSLMALILFLVPVVVIDSYYYGK	Oxidation (M);2 Phospho (STY)	39	141;142
sp|P08238|HS90B_HUMAN;sp|Q58FF8|H90B2_HUMAN	IEDVGSDEEDDSGK	Phospho (STY)		39
sp|Q13535|ATR_HUMAN	IHALTSLKETLYKNQEK	4 Phospho (STY)		54;224;225;293
sp|P20929|NEBU_HUMAN	IHTTPDTPEIRQVKK	2 Phospho (STY)		203;204
sp|Q5JU85|IQEC2_HUMAN	IILSNMRMQFSFEEYEK	2 Phospho (STY)		67;68
sp|Q02224|CENPE_HUMAN	INKMKNSNYADQFNIPTNITTK	3 Phospho (STY)		52;219;289
sp|Q68DN1|CB016_HUMAN	ISPEPLDQVTESARTQLQVAQSEEVILIDVPKVVQSVK	3 Phospho (STY)		83;235;236
sp|P46063|RECQ1_HUMAN	ISSMVVMENVGQQK	Oxidation (M);Phospho (STY)	12	49
sp|P0C221|CC175_HUMAN	KATTTVYINETYTK	2 Phospho (STY)		201;286
sp|Q9NTG1|PKDRE_HUMAN	KDFLPAGYLLYIVASVLNNMK	Oxidation (M);Phospho (STY)	40	149
sp|Q8IYX8|CE57L_HUMAN	KDISIQLSSAQSRCTLLEK	4 Phospho (STY)		110;111;112;113
sp|Q9NZJ4|SACS_HUMAN	KDLFMNTLYLKYSNILLNCK	Oxidation (M);2 Phospho (STY)	41	272;311
sp|P25440|BRD2_HUMAN	KDLPDSQQQHQSSK	2 Phospho (STY)		43;44
sp|Q9Y324|FCF1_HUMAN	KDPSALK	Phospho (STY)		166
sp|P05386|RLA1_HUMAN;sp|P05387|RLA2_HUMAN	KEESEESDDDMGFGLFD	Phospho (STY)		36
sp|Q8NGL9|OR4CG_HUMAN	KLITDDK	Phospho (STY)		247
sp|Q9H981|ARP8_HUMAN	KMYSSILVVGGGLMFHK	3 Phospho (STY)		143;144;307
sp|P29692|EF1D_HUMAN	KPATPAEDDEDDDIDLFGSDNEEEDK	Phospho (STY)		45
sp|Q02952|AKA12_HUMAN	LEHETAVTVSEEVSKQLLQTVNVPIIDGAK	Phospho (STY)		53
sp|Q5VUA4|ZN318_HUMAN	LEKRNSCLATANAK	2 Phospho (STY)		78;233
sp|Q9UJX5|APC4_HUMAN	LGQSIESSYSSIQK	2 Phospho (STY)		158;159
sp|Q8TCN5|ZN507_HUMAN	LHSLAAEALVTMPIRAAELTRANLGHYGDINLLDPDTSQR	Oxidation (M);2 Phospho (STY)	32	250;251
sp|Q02742|GCNT1_HUMAN	LKLLMGENNLETERMPSHK	Oxidation (M);Phospho (STY)	18	220
sp|P04217|A1BG_HUMAN	LLELTGPKSLPAPWLSMAPVSWITPGLKTTAVCR	Oxidation (M);2 Phospho (STY)	10	35;193;194
sp|Q6TDU7|CASC1_HUMAN	LLSQWKHYIQCDGSPDPSVAQEMNTFISLWK	Oxidation (M);Phospho (STY)	23	85
sp|Q9UBX3|DIC_HUMAN	LMNSKGEYQGVFHCAVETAKLGPLAFYK	Phospho (STY)		155
sp|Q9UBZ9|REV1_HUMAN	LMQQSVESVWNMAFDFILDNVQVVLQQTYGSTLKVT	Oxidation (M);2 Phospho (STY)	43	156;157
sp|Q9BQI5|SGIP1_HUMAN	LPSINDLDSIFGPVLSPK	Phospho (STY)		129
sp|Q86W25|NAL13_HUMAN	LRLSVSSHILERDLEILETSK	4 Phospho (STY)		102;103;104;241
sp|Q3KQU3|MA7D1_HUMAN	LSKSSATLWNSPSR	3 Phospho (STY)		62;63;64
sp|Q9NQC3|RTN4_HUMAN	LVSNNILHNQQELPTALTKLVK	2 Phospho (STY)		147;270
sp|O43295|SRGP3_HUMAN	MATFGSAGSINYPDK	Oxidation (M);Phospho (STY)	4	185
sp|Q5T9S5|CCD18_HUMAN	MFSSSAPVDQEIKSLREK	Oxidation (M);3 Phospho (STY)	22	73;74;75
sp|O14639|ABLM1_HUMAN	MIHRSTSQGSINSPVYSR	Oxidation (M);2 Phospho (STY)	2	13;282
sp|Q5T9Z0|TEDM1_HUMAN	MILKGCLLYPLCSPRNK	Phospho (STY)		295
sp|Q6ZS17|RIPR1_HUMAN	MMSLSVR	Oxidation (M);2 Phospho (STY)	24	88;89
sp|O95872|GPAN1_HUMAN	MSRPLLITFTPATDPSDLWK	Oxidation (M);2 Phospho (STY)	8	31;189
sp|Q7L2H7|EIF3M_HUMAN	MSVPAFIDISEEDQAAELRAYLKSK	Oxidation (M);2 Phospho (STY)	26	93;299
sp|Q15311|RBP1_HUMAN	MTECFLPPTSSPSEHR	Phospho (STY)		226
sp|Q9Y394|DHRS7_HUMAN	MTTSRCVRLMLISMANDLK	Oxidation (M);3 Phospho (STY)	47	167;277;278
sp|P00966|ASSY_HUMAN	NDLMEYAKQHGIPIPVTPK	Oxidation (M);Phospho (STY)	9	192
sp|P33176|KINH_HUMAN	PATAIGVIGNFTDAERR	Phospho (STY)		207
sp|P54198|HIRA_HUMAN	PCTEPVVAASARPAGDSVNKDSMNATSTPAALSPSVLTTPSK	Oxidation (M);Phospho (STY)	15	216
sp|P57058|HUNK_HUMAN	PEPHQPGPGSTGIPHKEDPLMLDMVRSFESVDR	Oxidation (M);Phospho (STY)	16	50
sp|Q8N1F7|NUP93_HUMAN	PGVIDKFTSDTKPIINK	3 Phospho (STY)		114;242;243
sp|Q7KZ85|SPT6H_HUMAN	PKKTTK	2 Phospho (STY)		176;177
sp|Q9H6S0|YTDC2_HUMAN	PMSSEELPLASSWRSNNSR	2 Phospho (STY)		139;140
sp|Q07157|ZO1_HUMAN	PPEVASKPSGAPIIGPKPTSQNQFSEHDK	Phospho (STY)		223
sp|B7Z368|CJ142_HUMAN	PRQDSAAGNSEER	2 Phospho (STY)		9;10
sp|Q6EMK4|VASN_HUMAN	PSPTPVTPRPPR	Phospho (STY)		84
sp|Q14149|MORC3_HUMAN	PTALSTPSFSSPKESVPR	3 Phospho (STY)		55;56;57
sp|Q9H270|VPS11_HUMAN	QILNIYDLCNKFIAYSTVFEDVVDVLAEWGSLYVLTRDGR	5 Phospho (STY)		138;264;265;305;306
sp|Q8N3T6|T132C_HUMAN	QPPVLNASYGPFSVEK	Phospho (STY)		117
sp|P18858|DNLI1_HUMAN	QRSIMSFFHPKK	Phospho (STY)		42
sp|Q8TCN5|ZN507_HUMAN	RAEMSQTNFTPDTLAQNEGK	Oxidation (M);Phospho (STY)	33	252
sp|P12314|FCGR1_HUMAN	REDSGLYWCEAATEDGNVLK	Phospho (STY)		41
sp|P46976|GLYG_HUMAN	RLVVLATPQVSDSMR	Oxidation (M);Phospho (STY)	13	213
sp|Q9Y5B0|CTDP1_HUMAN	RQPSMSETMPLYTLCK	Oxidation (M);Phospho (STY)	48	279
sp|Q68CJ6|SLIP_HUMAN	RRIYESLTASVQSDLK	3 Phospho (STY)		81;234
sp|P53396|ACLY_HUMAN	SAYDSTMETMNYAQIRTIAIIAEGIPEALTR	Oxidation (M);Phospho (STY)	14	215
sp|O94941|RNF37_HUMAN	SEATWGRVPSDPFTGVAFTPHSQPLPHPSLKAR	3 Phospho (STY)		28;187;188
sp|O14896|IRF6_HUMAN	SFDSGSVRLQISTPDIK	3 Phospho (STY)		15;16;184
sp|Q9NQX4|MYO5C_HUMAN	SFELKTQDYEKQIQSLK	3 Phospho (STY)		148;271;309
sp|Q5T3F8|CSCL2_HUMAN	SGENRTTMHKCYTFLIFMVLLLPSLGLSSLDLFFR	Oxidation (M);3 Phospho (STY)	21	70;71;72
sp|A6NMB1|SIG16_HUMAN	SGPMTGVVLVAVGEVAMK	Oxidation (M);Phospho (STY)	1	180
sp|P16415|ZN823_HUMAN	SHMITHTGDGPQK	Phospho (STY)		202
sp|Q9NYZ3|GTSE1_HUMAN	SIPGAAEKPK	Phospho (STY)		151
sp|P11168|GTR2_HUMAN	SISGLYCGLISGLVPMYIGEIAPTALR	Oxidation (M);Phospho (STY)	11	40
sp|Q9HBL7|PLRKT_HUMAN	SKLQLPRGMITFESIEK	2 Phospho (STY)		146;268
sp|Q5BJE1|CC178_HUMAN	SKYESEIKYLTIMK	2 Phospho (STY)		66;294
sp|Q9BV35|SCMC3_HUMAN	SMVLEGGIRSLWR	2 Phospho (STY)		130;131
sp|Q8IWY8|ZSC29_HUMAN	SPDLGPQEQMNPKEK	Oxidation (M);Phospho (STY)	27	106
sp|Q99965|ADAM2_HUMAN	SQCLHNQPRLDPFFK	Phospho (STY)		128
sp|Q5TAX3|TUT4_HUMAN	SQKQQTCTDNTGDSDDSASGIEDVSDDLSKMK	4 Phospho (STY)		76;77;231;232
sp|Q9UMR7|CLC4A_HUMAN	SSGINTASSAASK	3 Phospho (STY)		163;164;165
sp|O43318|M3K7_HUMAN	SSSPSVRMITTSGPTSEKPTR	Oxidation (M);4 Phospho (STY)	5	17;18;19;186
sp|Q9H9C1|SPE39_HUMAN	TEELALSHYREHLNIQDPDK	Phospho (STY)		266
sp|Q7Z5Q5|DPOLN_HUMAN	TESPSNSLAAPGSPASTQPPPLHFSPSFCL	6 Phospho (STY)		94;95;96;97;98;99;239;240
sp|Q92900|RENT1_HUMAN	TFAVDETSVSGYIYHKLLGHEVEDVIIKCQLPK	Phospho (STY)		256
sp|Q9P2P6|STAR9_HUMAN	TFWTEYKPPSPSRASK	4 Phospho (STY)		152;153;273;312
sp|Q99873|ANM1_HUMAN	TGFSTSPESPYTHWKQTVFYMEDYLTVK	Oxidation (M);6 Phospho (STY)	37	127;259;260;261;303;304
sp|Q9HBA0|TRPV4_HUMAN	TGNMREFINSPFRDIYYR	2 Phospho (STY)		145;267
sp|P0C091|FREM3_HUMAN	TNKQIQFNPGQTTATWRVR	3 Phospho (STY)		198;199;200
sp|Q9H095|DRC9_HUMAN	TNTELQIAQTQK	Phospho (STY)		263
sp|Q5T200|ZC3HD_HUMAN	TPSPSYQRTLTPPLR	3 Phospho (STY)		69;229;230
sp|Q8N271|PROM2_HUMAN	VDTQSLDLLSSAARR	2 Phospho (STY)		115;116
sp|A8TX70|CO6A5_HUMAN	VIFVISAGETNSLDK	2 Phospho (STY)		7;8
sp|O14733|MP2K7_HUMAN	VLQEEPPLLPGHMGFSGDFQSFVK	Oxidation (M);Phospho (STY)	3	14
sp|P49821|NDUV1_HUMAN	VSVRFSGDTTAPKK	Phospho (STY)		214
sp|P43304|GPDM_HUMAN	WTTYRSMAEDTINAAVK	4 Phospho (STY)		48;211;212;288
sp|O95932|TGM3L_HUMAN	YGGGTSPLHWRGSVAILQK	3 Phospho (STY)		34;191;285
sp|Q03001|DYST_HUMAN	YTALVTLMTQYIK	3 Phospho (STY)		221;222;290
sp|Q68CR1|SE1L3_HUMAN	YYNFSVFQIDAPSFAYLK	2 Phospho (STY)		82;297;298

## Sheet: parallel test 2
Proteins	Sequence	Modifications	Oxidation (M) site IDs	Phospho (STY) site IDs
sp|O15078|CE290_HUMAN	AEMTAAAEERIISATSQK	Phospho (STY)		227
sp|Q96SE7|ZN347_HUMAN	AFSVYSSLTTHQVIHTGEKPYK	3 Phospho (STY)		173;174;391
sp|P31948|STIP1_HUMAN	AKELDPTNMTYITNQAAVYFEK	Oxidation (M),2 Phospho (STY)	18	252;253
sp|Q9H497|TOR3A_HUMAN	ALALSFHGWSGTGKNFVARMLVENLYR	Oxidation (M),3 Phospho (STY)	61	181;326;395
sp|P51530|DNA2_HUMAN	AVEQQMDCSSVPIVMLPK	2 Phospho (STY)		55;56
sp|Q9UM47|NOTC3_HUMAN	CVCEPGWSGPR	Phospho (STY)		201
sp|Q8N336|ELMD1_HUMAN	DITKEEISKFSK	3 Phospho (STY)		138;139;304
sp|A8MVM7|YD021_HUMAN	DRKPSLHFLHSLASSSSLIYR	4 Phospho (STY)		9;10;11;12;13
sp|O43290|SNUT1_HUMAN	EAAGTTAAAGTGGATEQPPRHR	2 Phospho (STY)		229;230;231
sp|Q8WVS4|WDR60_HUMAN	EAEKSHSRGK	Phospho (STY)		154
sp|P08183|MDR1_HUMAN	EALDESIPPVSFWRIMK	Oxidation (M),Phospho (STY)	11	33
sp|P27448|MARK3_HUMAN	EARSKFR	Phospho (STY)		44
sp|Q99795|GPA33_HUMAN	EEEDDYRQEEQR	Phospho (STY)		392
sp|Q8IX07|FOG1_HUMAN	EEVQLVGASHMEQK	Phospho (STY)		131
sp|Q8IVF5|TIAM2_HUMAN	EGSDYFDSRSDGLNTDVQGSSQASAFLWSGGSTQILSQR	6 Phospho (STY)		124;125;126;127;128;129;381
sp|Q9BXI6|TB10A_HUMAN	EHLIQLRRWQETR	Phospho (STY)		323
sp|Q86TW2|ADCK1_HUMAN	EIHDLFQSFDDTPLGTASLAQVHK	3 Phospho (STY)		118;298;299
sp|P08238|HS90B_HUMAN;sp|Q58FF7|H90B3_HUMAN	EISDDEAEEEK	Phospho (STY)		34
sp|Q9NW64|RBM22_HUMAN	EISNSDGTRPVGMLGKATSTSDMLLK	2 Oxidation (M),3 Phospho (STY)	67;68	196;197;198;339
sp|Q9BXT5|TEX15_HUMAN	ENSASCVENNIENIYGDKK	Phospho (STY)		180
sp|P46013|KI67_HUMAN	EQPQPSGKQESGSEIHVEVKAQSLVISPPAPSPR	3 Phospho (STY)		48;49;50
sp|P13611|CSPG2_HUMAN	ERTETLIPEMRTDTYTDEIQEEITK	Oxidation (M),2 Phospho (STY)	15	244;245
sp|P07900|HS90A_HUMAN	ESEDKPEIEDVGSDEEEEKK	Phospho (STY)		31
sp|Q9UJ55|MAGL2_HUMAN	ETNGLFGNTKK	Phospho (STY)		348
sp|A4D1F6|LRRD1_HUMAN	ETSNLINEASDYLEGKSSNQIYETHPR	4 Phospho (STY)		6;7;221;359
sp|P07900|HS90A_HUMAN	EVSDDEAEEK	Phospho (STY)		32
sp|P13667|PDIA4_HUMAN	FIEEHATKLSR	2 Phospho (STY)		37;246
sp|Q15751|HERC1_HUMAN	FRGLTASVLLDLTYLTGVHEDMGKQSTK	3 Phospho (STY)		79;272;273;371
sp|O75161|NPHP4_HUMAN	FSGGSLLTTGSSRRK	4 Phospho (STY)		22;23;235;236
sp|Q8N573|OXR1_HUMAN	FYTIDTGQKK	Phospho (STY)		305
sp|P46013|KI67_HUMAN	GEAGNSDSMCLRSR	Oxidation (M),3 Phospho (STY)	20	51;52;53
sp|Q16181|SEPT7_HUMAN	GFEFTLMVVGESGLGKSTLINSLFLTDLYSPEYPGPSHRIK	Oxidation (M),3 Phospho (STY)	38	82;83;274
sp|Q5TGI4|SAMD5_HUMAN	GHTTAPRSRELVSYPK	3 Phospho (STY)		289;290;375
sp|Q8IZU2|WDR17_HUMAN	GLMWNTEIPYLLISGSWDYTIK	Phospho (STY)		303
sp|Q9UKJ3|GPTC8_HUMAN	GPKPEPPGSGSPAPPRR	Phospho (STY)		199
sp|Q2NL82|TSR1_HUMAN	GQTLNVNRLLHIVGYGDFQMK	Oxidation (M),2 Phospho (STY)	40	276;372
sp|Q8N573|OXR1_HUMAN	GTIEYTVESRDSLNSIALK	3 Phospho (STY)		141;306;382
sp|Q9P2K2|TXD16_HUMAN	GTSTMLLTR	Oxidation (M),2 Phospho (STY)	69	344;345
sp|Q16665|HIF1A_HUMAN	GVIEQTEKSHPRSPNVLSVALSQR	2 Phospho (STY)		84;275
sp|Q8WY54|PPM1E_HUMAN	GYSENMRKLR	Oxidation (M),Phospho (STY)	53	155
sp|Q6AI08|HEAT6_HUMAN	HMGSIQAPTGDTARR	Phospho (STY)		292
sp|Q92766|RREB1_HUMAN	HMRSHTGERPYK	Oxidation (M),Phospho (STY)	54	389
sp|Q96R09|OR5B2_HUMAN	HTSEVILVFMSSFNIFFVLLVIFISYLFIFITILK	5 Phospho (STY)		168;169;170;171;317;318
sp|Q8TE96|DQX1_HUMAN	HVAQLSSYCCYR	3 Phospho (STY)		153;386;387
sp|P08238|HS90B_HUMAN;sp|Q58FF8|H90B2_HUMAN	IEDVGSDEEDDSGK	Phospho (STY)		35
sp|Q12907|LMAN2_HUMAN	IEPSVNFLKSPK	Phospho (STY)		67
sp|O60885|BRD4_HUMAN	IIKTPMDMGTIKK	Oxidation (M),Phospho (STY)	5	234
sp|Q92547|TOPB1_HUMAN	IKENDRSLYICDPFSGVVFDHLK	Phospho (STY)		388
sp|Q709C8|VP13C_HUMAN	ISLDYHEIEGSK	2 Phospho (STY)		110;111
sp|Q8NEE6|DRC6_HUMAN	KAAQRMSSK	Oxidation (M),2 Phospho (STY)	51	146;147
sp|Q8IWC1|MA7D3_HUMAN	KADETNTTSR	Phospho (STY)		130
sp|P0C221|CC175_HUMAN	KATTTVYINETYTK	2 Phospho (STY)		240;364
sp|Q8IYX8|CE57L_HUMAN	KDISIQLSSAQSRCTLLEK	4 Phospho (STY)		132;133;134;135
sp|P25440|BRD2_HUMAN	KDLPDSQQQHQSSK	2 Phospho (STY)		42;43
sp|Q99459|CDC5L_HUMAN	KDRIESLEK	Phospho (STY)		175
sp|Q99666|RGPD5_HUMAN;sp|O14715|RGPD8_HUMAN	KEMQELKLNSSK	Oxidation (M),2 Phospho (STY)	3	14;15
sp|P51812|KS6A3_HUMAN	KETMTMILKAK	Oxidation (M),2 Phospho (STY)	23	261;262
sp|Q8NCR9|CLRN3_HUMAN	KKFAVLEILNNSSQK	Phospho (STY)		143
sp|Q9Y597|KCTD3_HUMAN	KSDSSGQEYSL	2 Phospho (STY)		211;212
sp|P27448|MARK3_HUMAN	KSSTVPSSNTASGGMTR	3 Phospho (STY)		45;46;250;251
sp|Q9H6B1|Z385D_HUMAN	KSSVMTTEITSK	3 Phospho (STY)		183;184;329;330
sp|Q8WZ42|TITIN_HUMAN	KTWSTVTPEVKK	2 Phospho (STY)		159;312
sp|Q9P2E9|RRBP1_HUMAN	KVDTTPNQGKK	Phospho (STY)		343
sp|Q5VVP1|S31A6_HUMAN;sp|Q5TZJ5|S31A1_HUMAN	KVLGVTSEESER	2 Phospho (STY)		101;102
sp|Q13651|I10R1_HUMAN	KVPGNFTFTHKK	2 Phospho (STY)		267;268
sp|Q9Y4H2|IRS2_HUMAN	LCPSCPASSPK	3 Phospho (STY)		208;209;210
sp|Q7Z6E9|RBBP6_HUMAN	LEVTEIVKPSPK	2 Phospho (STY)		116;296
sp|P08588|ADRB1_HUMAN	LFVFFNWLGYANSAFNPIIYCR	2 Phospho (STY)		36;363
sp|O75427|LRCH4_HUMAN	LGALPPDIGTLGSLRQLDVSSNELQSLPSELCGLSSLR	4 Phospho (STY)		24;25;26;27
sp|Q9NSI5|IGSF5_HUMAN	LIMWALSDMVVLSVRPMEPIITNDR	2 Oxidation (M),Phospho (STY)	65;66	195
sp|Q96RT1|ERBIN_HUMAN	LKDEETNEDSGR	Phospho (STY)		172
sp|Q5T2D2|TRML2_HUMAN	LLASTRPASKTGYSFTATSTTSQGPR	7 Phospho (STY)		96;97;98;99;100;284;285;286;287;288;374
sp|Q8WYP5|ELYS_HUMAN	LLATASFTKSSRSSR	5 Phospho (STY)		156;157;158;310;311
sp|Q8NBI6|XXLT1_HUMAN	LLEPAQVQQLADKYHFR	Phospho (STY)		383
sp|Q96GX5|GWL_HUMAN	LLKSCLETVASNPGMPVK	Oxidation (M),3 Phospho (STY)	55	163;164;315
sp|P51610|HCFC1_HUMAN	LLVFGGMVEYGK	Oxidation (M),Phospho (STY)	22	368
sp|Q9BX84|TRPM6_HUMAN	LPHSWSNVICAEVLGSMEIAGEKK	2 Phospho (STY)		178;179
sp|Q13813|SPTN1_HUMAN	LQQSHPLSATQIQVKR	2 Phospho (STY)		73;74
sp|Q1MSJ5|CSPP1_HUMAN	LQRPPSVDSIIRSFIHESSMSR	Oxidation (M),3 Phospho (STY)	39	85;86;87
sp|Q3KQU3|MA7D1_HUMAN	LSKSSATLWNSPSR	3 Phospho (STY)		89;90;278
sp|P17706|PTN2_HUMAN	LTGDRCTGLSSKMQDTMEENSESALR	Oxidation (M),6 Phospho (STY)	16	39;40;41;247;248;249
sp|P29972|AQP1_HUMAN	MASEFKK	Oxidation (M),Phospho (STY)	17	47
sp|Q8TE23|TS1R2_HUMAN	MASRFPRAYSYWVR	2 Phospho (STY)		152;385
sp|Q9BV29|CCD32_HUMAN	MFESADSTATR	Oxidation (M),2 Phospho (STY)	59	177;321;322
sp|Q9HBW9|AGRL4_HUMAN	MKRLPLLVVFSTLLNCSYTQNCTK	3 Phospho (STY)		187;332;333;334
sp|Q6ZS17|RIPR1_HUMAN	MMSLSVR	Oxidation (M),2 Phospho (STY)	44	108;109
sp|Q6ZS17|RIPR1_HUMAN	MMSLSVR	Oxidation (M),2 Phospho (STY)	44	108;109
sp|P06241|FYN_HUMAN	MPCPQDCPISLHELMIHCWKK	Oxidation (M),Phospho (STY)	7	30
sp|Q09666|AHNK_HUMAN	MPSLEISAPK	Phospho (STY)		63
sp|Q5HYW3|RTL5_HUMAN	MSEASGNLNSLR	Oxidation (M),2 Phospho (STY)	43	92;93
sp|Q02297|NRG1_HUMAN	MSPVDFHTPSSPK	2 Phospho (STY)		59;60
sp|Q96KF7|SMIM8_HUMAN	MSSAPEPPTFK	Oxidation (M),2 Phospho (STY)	56	165;316
sp|C9JBD0|KRBX1_HUMAN	MTAVSLTTR	Oxidation (M),2 Phospho (STY)	2	224;225
sp|Q9NRN9|METL5_HUMAN	NAEEFELTNIDMVQCDVCLLSNR	Oxidation (M),Phospho (STY)	64	194
sp|Q8TBZ3|WDR20_HUMAN	NHSMGHISSKSSDKLNLVTK	Oxidation (M),3 Phospho (STY)	52	149;150;151
sp|P46013|KI67_HUMAN	NINTFVETPVQK	Phospho (STY)		256
sp|A0A0B4J1Y9|HV372_HUMAN	NKANSYTTEYAASVKGR	4 Phospho (STY)		2;218;219;358
sp|P12821|ACE_HUMAN	NMQIANHTLK	Oxidation (M),Phospho (STY)	14	243
sp|Q8IUH2|CREG2_HUMAN	NPMASLMLPESEGEFCRK	Oxidation (M),Phospho (STY)	48	123
sp|Q93100|KPBB_HUMAN	NRQTLCSLLPR	Phospho (STY)		160
sp|P33176|KINH_HUMAN	PATAIGVIGNFTDAERR	Phospho (STY)		254
sp|Q8IZ40|RCOR2_HUMAN	PPLPTAPTLLR	Phospho (STY)		302
sp|Q9HCE3|ZN532_HUMAN	PSEQTASVMASVTSLLSSPASAAVLSSPPR	7 Phospho (STY)		188;189;190;191;192;193;336
sp|Q15911|ZFHX3_HUMAN	PSPADPGSVREDSGFICWKK	2 Phospho (STY)		80;81
sp|Q9Y608|LRRF2_HUMAN	PTSAYYTR	3 Phospho (STY)		213;356;397
sp|Q9BQJ4|TMM47_HUMAN	PVAVMLFAAVVLQVCSLVLYPIK	2 Phospho (STY)		176;394
sp|P51532|SMCA4_HUMAN	PWPEGPMANAAAPTSTPQK	Oxidation (M),2 Phospho (STY)	21	57;260
sp|A6NCI8|CB078_HUMAN	PWRKPTVPEPVMSTPITEEQR	Oxidation (M),3 Phospho (STY)	1	8;222;223
sp|Q6PIZ9|TRAT1_HUMAN	QDKMYSYSSDHTR	5 Phospho (STY)		106;107;294;377;378
sp|P47895|AL1A3_HUMAN	RANSTDYGLTAAVFTKNLDK	Phospho (STY)		54
sp|A0AVK6|E2F8_HUMAN	RASMLEDSGSK	2 Phospho (STY)		3;4;5
sp|Q9UQ35|SRRM2_HUMAN	RDRSGSSQSTSR	3 Phospho (STY)		206;207;353
sp|P62191|PRS4_HUMAN	RIFQIHTSR	2 Phospho (STY)		58;263
sp|Q9H8Y5|ANKZ1_HUMAN	RLAAQLGAPTSPIPDSAIVNTRR	2 Phospho (STY)		185;331
sp|Q9HBT7|ZN287_HUMAN	RMNSSSRSQILLR	Oxidation (M),Phospho (STY)	63	186
sp|Q68CJ6|SLIP_HUMAN	RRIYESLTASVQSDLK	3 Phospho (STY)		103;291;376
sp|O75899|GABR2_HUMAN	RVGTLTQDVQR	2 Phospho (STY)		237;238
sp|Q13813|SPTN1_HUMAN	SARLMVHTVATFNSIK	Oxidation (M),3 Phospho (STY)	29	75;269;270
sp|Q9NY15|STAB1_HUMAN	SATCQVTADGK	2 Phospho (STY)		340;341
sp|Q86SQ0|PHLB2_HUMAN	SETTELMK	Oxidation (M),2 Phospho (STY)	45	117;297
sp|Q8TD26|CHD6_HUMAN	SFIWELITPTK	Phospho (STY)		309
sp|Q12772|SRBP2_HUMAN	SFTQVTLPSFSPSAASPQAPTLQVK	4 Phospho (STY)		64;65;66;264;265
sp|Q9Y5G0|PCDGH_HUMAN	SGEITTQKK	2 Phospho (STY)		354;355
sp|Q96NH3|BROMI_HUMAN	SGFINELITELWSNLEYGRDDVR	3 Phospho (STY)		166;167;390
sp|Q5SRD0|WAC2D_HUMAN;sp|Q9Y4E1|WAC2C_HUMAN	SIFDDDMDDIFSTGIQAKTTKPK	2 Phospho (STY)		95;282;283
sp|O43739|CYH3_HUMAN	SIKASISRDPFYDMLATR	3 Phospho (STY)		20;232;362
sp|Q9H3R1|NDST4_HUMAN	SMELKTVKPIDTSK	Oxidation (M),2 Phospho (STY)	60	324;325
sp|Q9NUB1|ACS2L_HUMAN	SPESVALIWERDEPGTEVRITYR	2 Phospho (STY)		337;338
sp|Q9UMR7|CLC4A_HUMAN	SSGINTASSAASKER	3 Phospho (STY)		202;203;204
sp|Q13615|MTMR3_HUMAN	SSGSKLSTR	3 Phospho (STY)		70;71;72
sp|O60706|ABCC9_HUMAN	STLDYSTERLK	2 Phospho (STY)		21;233
sp|Q9H4E7|DEFI6_HUMAN	TANRTYEMSASDTR	Oxidation (M),3 Phospho (STY)	62	182;327;328
sp|Q6Q759|SPG17_HUMAN	TEISDQEKEKEK	Phospho (STY)		295
sp|O15417|TNC18_HUMAN	TETLLPGPRPCPSPLPPPPAPPK	Phospho (STY)		228
sp|Q6GYQ0|RGPA1_HUMAN	TGISLNIPAPQPVCISEK	3 Phospho (STY)		104;105;293
sp|A2A3K4|PTPC1_HUMAN	TMSEMVTMQLDKELLR	Oxidation (M),Phospho (STY)	0	220
sp|Q96DW6|S2538_HUMAN	TRYESGK	2 Phospho (STY)		162;314
sp|P03951|FA11_HUMAN	TSESGLPSTRIKK	2 Phospho (STY)		28;29;239
sp|P49454|CENPF_HUMAN	TTAQYDQASTKYTALEQK	2 Phospho (STY)		257;258;259;367
sp|Q9UPN3|MACF1_HUMAN	TVRERLISLQMETTGLIDPDSK	2 Phospho (STY)		205;352
sp|Q8N271|PROM2_HUMAN	VDTQSLDLLSSAARR	2 Phospho (STY)		136;137
sp|Q96DM1|PGBD4_HUMAN	VDVSDITDPLQYFELFFTEELVSK	2 Phospho (STY)		161;313
sp|Q86VH2|KIF27_HUMAN	VHTSPPMYSLDRIFAGFRTR	Oxidation (M),3 Phospho (STY)	47	120;121;379
sp|Q76L83|ASXL2_HUMAN	VISPSQKHSK	2 Phospho (STY)		114;115
sp|Q9HCE1|MOV10_HUMAN	VNFTFNRQPLR	Phospho (STY)		335
sp|Q86YC2|PALB2_HUMAN	VSDPSGEQKQK	Phospho (STY)		122
sp|Q58EX2|SDK2_HUMAN	VTGLTALTTYTIEVAAMTSK	2 Phospho (STY)		279;280
sp|Q58G82|SY14L_HUMAN	VTLFQLSHVTLMLSVYNKSSMRR	2 Oxidation (M),2 Phospho (STY)	41;42	91;281
sp|Q9UH03|SEPT3_HUMAN	VVNIIPVIAKADTMTLEEK	Oxidation (M),2 Phospho (STY)	72	346;347
sp|Q14679|TTLL4_HUMAN	WKMSTVTPNIVK	Oxidation (M),2 Phospho (STY)	33	76;271
sp|P14616|INSRR_HUMAN	YAKFGGVHLALLPPGNYSARVR	2 Phospho (STY)		38;366
sp|Q71F56|MD13L_HUMAN	YDKQMAVPSRNTSK	2 Phospho (STY)		112;113
sp|Q8IV33|K0825_HUMAN	YDNLMKEMTKK	Oxidation (M),Phospho (STY)	49	380
sp|Q09161|NCBP1_HUMAN	YGDESSNSLPGHSVALCLAVAFKSK	3 Phospho (STY)		61;62;369
sp|P0DOX6|IGM_HUMAN	YNQSQKISSTR	2 Phospho (STY)		241;365
sp|Q13342|SP140_HUMAN	YQESPEGRDK	2 Phospho (STY)		69;370
sp|Q8NEY1|NAV1_HUMAN	YQLQSQEETKERR	3 Phospho (STY)		148;308;384
sp|Q9P2D7|DYH1_HUMAN	YRECITKK	2 Phospho (STY)		342;396

## Sheet: parallel test 3
Proteins	Sequence	Modifications	Oxidation (M) site IDs	Phospho (STY) site IDs
sp|Q86VP6|CAND1_HUMAN	AAAKCLDAVVSTRHEMLPEFYK	Oxidation (M),3 Phospho (STY)		131;307
sp|Q92797|SYMPK_HUMAN	AILTMTQLYKVALQWMVK	Oxidation (M),2 Phospho (STY)		344;414
sp|Q9NXG0|CNTLN_HUMAN	AKSEMATMKVR	Oxidation (M),2 Phospho (STY)	43	219;368
sp|Q9Y490|TLN1_HUMAN	ALHYGRECANGYLELLDHVLLTLQK	Phospho (STY)		381
sp|Q8TE49|OTU7A_HUMAN	ALYTMMRTGAER	Oxidation (M),2 Phospho (STY)		329;330
sp|Q8NDB2|BANK1_HUMAN	ATTKIKYYPTAK	4 Phospho (STY)		317;318;319;410
sp|Q99678|GPR20_HUMAN	AVCAFVWLAAGAVTLSVLGVTGSR	2 Phospho (STY)		189;190;353
sp|P51530|DNA2_HUMAN	AVEQQMDCSSVPIVMLPK	2 Phospho (STY)		66;67
sp|Q8TF76|HASP_HUMAN	AWDHYNSTK	Phospho (STY)		413
sp|Q86SZ2|TPC6B_HUMAN	CITKLENMGFR	Oxidation (M),Phospho (STY)		304
sp|Q5VST9|OBSCN_HUMAN	CQAGSAHSSTEVTVEAR	4 Phospho (STY)		104;105;106;296
sp|Q9NS00|C1GLT_HUMAN	CTHSSSIEDLALGR	3 Phospho (STY)		213;214;367
sp|Q8IV35|WDR49_HUMAN	DDSTYNVRPSEDINLDIKYK	Phospho (STY)		406
sp|Q8IYD1|ERF3B_HUMAN	DMGTVVLGKLESGSIFK	Oxidation (M),2 Phospho (STY)		147;148
sp|P61565|ENK21_HUMAN;sp|Q902F9|EN113_HUMAN	DSDHRERAMMTMVVLSK	2 Phospho (STY)		70;278
sp|Q9H307|PININ_HUMAN	DSSSSTSSSSESRSRSR	9 Phospho (STY)		202;203;204;205;206;207;208;209;362
sp|Q96PZ7|CSMD1_HUMAN	EAGDTVTFQCDPGYQLQGQAK	Phospho (STY)		415
sp|Q8TBZ6|TM10A_HUMAN	EDLIYLTSDSPNILK	Phospho (STY)		162;412
sp|Q8TBZ6|TM10A_HUMAN	EDLIYLTSDSPNILK	2 Phospho (STY)		162;412
sp|Q99795|GPA33_HUMAN	EEEDDYRQEEQR	Phospho (STY)		416
sp|Q13616|CUL1_HUMAN	EFLKNYLTNLLKDGEDLMDESVLK	Phospho (STY)		77
sp|P08758|ANXA5_HUMAN	EFRKNFATSLYSMIK	4 Phospho (STY)		46;47;259;385
sp|Q9NY15|STAB1_HUMAN	EILTTAGPFTVLVPSVSSFSSR	3 Phospho (STY)		220;221;369
sp|P10275|ANDR_HUMAN	ELHQFTFDLLIK	Phospho (STY)		264
sp|Q9BQY4|RHXF2_HUMAN;sp|P0C7M4|RHF2B_HUMAN	ELQDMNAMVLSLTEEVK	Oxidation (M),Phospho (STY)		49
sp|Q14204|DYHC1_HUMAN	EMTRWVR	Phospho (STY)		281
sp|H3BUK9|POTB2_HUMAN;sp|A0A0A6YYL3|POTEB_HUMAN;sp|A0JP26|POTB3_HUMAN;sp|Q86YR6|POTED_HUMAN	ENKILEEIESVKEK	Phospho (STY)		9
sp|Q9NRX1|PNO1_HUMAN	ESEMETQSARAEEGFTQVTR	Oxidation (M),3 Phospho (STY)		212;365;366
sp|Q9NQL2|RRAGD_HUMAN	ESTAIIKLNNTTVLYLKEVTK	3 Phospho (STY)		211;363;364
sp|Q8WXI7|MUC16_HUMAN	ETSTSQEIHSATK	4 Phospho (STY)		166;331;332;333
sp|P23276|KELL_HUMAN	EYLTYLNQLGTLLGGDPSK	2 Phospho (STY)		55;268
sp|O00506|STK25_HUMAN	FITRYTK	2 Phospho (STY)		250;382
sp|O60516|4EBP3_HUMAN	FLLECKNSPIARTPPCCLPQIPGVTTPPTAPLSK	3 Phospho (STY)		31;252;253
sp|A6NHX0|CAST2_HUMAN	FPSNLLFTSASGELWKMVR	Oxidation (M),3 Phospho (STY)		15;16;17
sp|Q15911|ZFHX3_HUMAN	FRTQMTNLQLK	Oxidation (M),2 Phospho (STY)	22	285;286
sp|Q5CZC0|FSIP2_HUMAN	FSYSRNQKSAYADDNQITVVEK	2 Phospho (STY)		97;395
sp|Q15788|NCOA1_HUMAN	GAFSPGMGMQPR	2 Oxidation (M),Phospho (STY)		87
sp|P37802|TAGL2_HUMAN	GASQAGMTGYGMPRQIL	Oxidation (M),2 Phospho (STY)	18	59;389
sp|Q86VV8|RTTN_HUMAN	GAVSNSLMLCILK	2 Phospho (STY)		132;133
sp|Q2TAK8|PWP3A_HUMAN	GKPMEHVSSPCDSNSSSLPRGDVLGSSR	6 Phospho (STY)		88;89;90;91;92;93;94
sp|Q96A00|PP14A_HUMAN	GPGGSPGGLQK	Phospho (STY)		177
sp|Q92817|EVPL_HUMAN	GSPKGSPAKGSPK	Phospho (STY)		176
sp|Q86TI4|WDR86_HUMAN	GSVICLELVNRLVYSGSADRTVK	4 Phospho (STY)		123;124;305
sp|Q4G176|ACSF3_HUMAN	GVLSTHQNIRAVVTGLVHKWAWTK	3 Phospho (STY)		95;288;289
sp|Q8IZT6|ASPM_HUMAN	HKASIVIQSTYRMYR	Oxidation (M),3 Phospho (STY)	33	149;150;314
sp|Q9P2F6|RHG20_HUMAN	HKSLQMEGQKLINQSLVMGIEVGK	2 Oxidation (M),Phospho (STY)		226
sp|P61764|STXB1_HUMAN	HYPYISTR	3 Phospho (STY)		71;391;392
sp|Q58FF8|H90B2_HUMAN;sp|P08238|HS90B_HUMAN	IEDVGSDEEDDSGK	Phospho (STY)		45
sp|Q8WXI7|MUC16_HUMAN	IESETTFSLIFRLRETSTSQK	5 Phospho (STY)		167;168;334;335;336
sp|Q0VF96|CGNL1_HUMAN	IIHLEGSYRSSKEGLVVQMEAR	2 Phospho (STY)		75;76
sp|Q9NWW7|CB042_HUMAN	IITGSDLQVYSVRQRDR	2 Phospho (STY)		215;419
sp|P12882|MYH1_HUMAN;sp|Q9UKX2|MYH2_HUMAN	IKNAYEESLDQLETLKR	Phospho (STY)		388
sp|A2RUB1|MEIOC_HUMAN	IKQPNGFCDNYSAQK	Phospho (STY)		10
sp|Q9UNK0|STX8_HUMAN	IQQRNQYER	Phospho (STY)		421
sp|Q86XX4|FRAS1_HUMAN	ISGSEVEELSEVSNFTMEDINNK	Oxidation (M),2 Phospho (STY)		138;139
sp|Q63ZE4|S22AA_HUMAN	ISQILFMFLVGLSILANTFVPK	2 Phospho (STY)		107;297
sp|Q9BQ15|SOSB1_HUMAN	ITRSQPNHTPAGPPGPSSNPVSNGKETR	5 Phospho (STY)		193;194;356;357;358
sp|Q9UF33|EPHA6_HUMAN	IVSSIQTLRLHMMHIQEK	2 Oxidation (M),Phospho (STY)		229
sp|P0C221|CC175_HUMAN	KATTTVYINETYTK	2 Phospho (STY)		262;263
sp|Q9UL03|INT6_HUMAN	KDFQQLLQGISEDVPHR	Phospho (STY)		233
sp|Q8IXR9|CL056_HUMAN	KESELHLYVISTTSSIFLHLK	3 Phospho (STY)		145;146;312;313
sp|Q4ZG55|GREB1_HUMAN	KGFCYFTEFSNHINLK	2 Phospho (STY)		96;290
sp|Q9NX95|SYBU_HUMAN	KLESLLQSMEMAHSGSLR	Phospho (STY)		218
sp|O75781|PALM_HUMAN	KTEVVMNSQQTPVGTPK	Oxidation (M),Phospho (STY)	10	32
sp|Q96NH3|BROMI_HUMAN	KWMHAHYSR	Oxidation (M),Phospho (STY)	39	186
sp|Q13619|CUL4A_HUMAN	LEEEGDRVITYLDHSTQK	Phospho (STY)		394
sp|Q7RTR2|NLRC3_HUMAN	LFLPLSRVSVPPRVSITIGVAGMGK	Oxidation (M),3 Phospho (STY)	28	121;122;303
sp|Q86XQ3|CTSR3_HUMAN	LFRLLEFSEIFFVSICTSELSMK	Oxidation (M),3 Phospho (STY)	29	135;136;137;308
sp|Q6P1M0|S27A4_HUMAN	LLDMADVAVYGVEVPGTEGR	Oxidation (M),Phospho (STY)		299
sp|Q86YR7|MF2L2_HUMAN	LMTLSIRQLGRGSHR	Oxidation (M),3 Phospho (STY)	30	140;141;309
sp|Q96Q89|KI20B_HUMAN	LQTEPLSTSFEISRNK	3 Phospho (STY)		187;188;352
sp|O60336|MABP1_HUMAN	LSSEMTISMRQRLAELR	2 Oxidation (M),3 Phospho (STY)	8;9	29;30;251
sp|O15085|ARHGB_HUMAN	LSSLSSLGDSAPERK	3 Phospho (STY)		24;25;26
sp|Q8N3P4|VPS8_HUMAN	LSSSAIPHLHSEALK	Phospho (STY)		152
sp|Q06495|NPT2A_HUMAN	LSYGERLGSPAVSPLPVRGGHVMR	4 Phospho (STY)		72;73;74;393
sp|Q15697|ZN174_HUMAN	MAAKMEITLSSNTEASSK	Oxidation (M),3 Phospho (STY)		84;85;86
sp|Q8N8R7|AL14E_HUMAN	MDPCSVGVQLRTTNECHKTYYTR	Oxidation (M),Phospho (STY)	34	315
sp|Q5T9Z0|TEDM1_HUMAN	MILKGCLLYPLCSPRNK	Phospho (STY)		398
sp|P09172|DOPO_HUMAN	MLKKVVSVHPGDVLITSCTYNTEDR	3 Phospho (STY)		48;260;261
sp|O75063|XYLK_HUMAN	MMTGLRVELAPK	Oxidation (M),Phospho (STY)		254
sp|A6NE02|BTBDH_HUMAN	MPRRGYSK	Oxidation (M),Phospho (STY)	4	13
sp|Q9NP80|PLPL8_HUMAN	MSINLTVDIYIYLLSNARSVCGKQR	Phospho (STY)		418
sp|Q9Y394|DHRS7_HUMAN	MTTSRCVRLMLISMANDLK	Oxidation (M),3 Phospho (STY)		240;379;380
sp|Q8TDG2|ACTT1_HUMAN	MVSSSIMK	Oxidation (M),3 Phospho (STY)	36	163;164;165
sp|Q8NEV8|EXPH5_HUMAN	MYIPHTDKSNDIKQDK	Oxidation (M),2 Phospho (STY)	35	323;411
sp|Q96AC1|FERM2_HUMAN	NKQITAR	Phospho (STY)		345
sp|Q8IV33|K0825_HUMAN	NLHTYLSTAVYVFQHFK	3 Phospho (STY)		142;310;311
sp|Q96B45|BORC7_HUMAN	NMVLQEDAILHSEDSLRK	2 Phospho (STY)		178;179
sp|Q7LBR1|CHM1B_HUMAN	NQAVNFLRMSAR	Oxidation (M),Phospho (STY)	27	120
sp|A0A0A6YYK7|TVA19_HUMAN	NSFDEQNEISGR	Phospho (STY)		8
sp|Q6PIF2|SYCE2_HUMAN	NSLKTKVSDLTEK	3 Phospho (STY)		113;300;301
sp|P33176|KINH_HUMAN	PATAIGVIGNFTDAERR	Phospho (STY)		269
sp|P22748|CAH4_HUMAN	PEMSTTMAESSLLDLLPK	Oxidation (M),2 Phospho (STY)		53;54;267
sp|Q15555|MARE2_HUMAN	PGSTPSRPSSAK	2 Phospho (STY)		81;82;83
sp|Q9BTA9|WAC_HUMAN	PLISTPPVSSQPK	Phospho (STY)		195
sp|Q7LBC6|KDM3B_HUMAN	PRSETEEMGDEEVFSWLK	Oxidation (M),Phospho (STY)		119
sp|Q96II8|LRCH3_HUMAN	PRSVPSIHVPSPAVPKLTMAK	Oxidation (M),2 Phospho (STY)	38	184;185
sp|O94779|CNTN5_HUMAN	QEGHSNSQVIETQK	Phospho (STY)		255
sp|Q96BY6|DOC10_HUMAN	QESSKISTEDLVK	2 Phospho (STY)		180;346
sp|Q66GS9|CP135_HUMAN	QTLTVECLPLVEKLFSDLVHTTESLRQSK	3 Phospho (STY)		108;109;298
sp|Q92616|GCN1_HUMAN	RAVMLLHTHTITSRVGK	2 Phospho (STY)		175;343
sp|Q6ZQY3|GADL1_HUMAN	REGFKLLMEPEYANICFWYIPPSLR	Oxidation (M),2 Phospho (STY)		118;404
sp|Q16787|LAMA3_HUMAN	RGTIEAAMPECDR	Phospho (STY)		287
sp|Q99973|TEP1_HUMAN	RKIHSGSVTALHVLPELLVTASK	4 Phospho (STY)		191;192;354;355
sp|P19022|CADH2_HUMAN	RNWTITR	Phospho (STY)		266
sp|Q14004|CDK13_HUMAN	RQKQMGMTDDVSTIK	Oxidation (M),2 Phospho (STY)	21	78;280
sp|A8MWP4|YU008_HUMAN	RQSQMDAASTR	Oxidation (M),Phospho (STY)	5	23
sp|Q68CJ6|SLIP_HUMAN	RRIYESLTASVQSDLK	2 Phospho (STY)		110;400
sp|P49796|RGS3_HUMAN	RSSMIETGQGAEGGLSLR	3 Phospho (STY)		64;65;276
sp|Q06830|PRDX1_HUMAN	RTIAQDYGVLK	Phospho (STY)		279
sp|P12882|MYH1_HUMAN;sp|Q9Y623|MYH4_HUMAN	SAETEKEMANMKEEFEK	2 Oxidation (M),Phospho (STY)	13;14	52
sp|Q8NGX3|O10T2_HUMAN	SASDKDQLVAVTYTVVTPLLNPLVYSLRNK	5 Phospho (STY)		158;159;160;324;325;326
sp|Q8NEY1|NAV1_HUMAN	SDDELLSSKAKAQK	2 Phospho (STY)		155;156;157
sp|P12429|ANXA3_HUMAN	SDTSGDYEITLLK	2 Phospho (STY)		50;51;265;387
sp|P56199|ITA1_HUMAN	SECTKHSFYMLDKHDFQDSVR	Oxidation (M),3 Phospho (STY)		68;69;277
sp|Q9BZ76|CNTP3_HUMAN;sp|Q96NU0|CNT3B_HUMAN	SFHGCLENLYYNGVDVTELAKK	Phospho (STY)		351
sp|Q6X4W1|NSMF_HUMAN	SFSRSWSDPTPMKADTSHDSR	4 Phospho (STY)		114;115;116;117;302
sp|Q96EP1|CHFR_HUMAN	SGQVTLEDTSTSGTVINK	4 Phospho (STY)		181;182;183;347;348
sp|Q9P265|DIP2B_HUMAN	SKLLSPYSPQTQETDSAVQKELR	4 Phospho (STY)		222;223;224;370
sp|Q9BY15|AGRE3_HUMAN	SKSESETYTLSSKMGPDSK	Oxidation (M),4 Phospho (STY)		198;199;200;201
sp|Q14332|FZD2_HUMAN	SLAIPCPAHYTPRMSPDFTVYMIK	3 Phospho (STY)		79;282;283
sp|Q9P2D7|DYH1_HUMAN	SMNKINFDHVVSSKPETFSYVTLPK	3 Phospho (STY)		225;371
sp|Q8NCM8|DYHC2_HUMAN	SQITWDNPKELEGYIQK	2 Phospho (STY)		316;409
sp|O60306|AQR_HUMAN	SQVQQLISLPMWMGLQLARLELELK	Oxidation (M),2 Phospho (STY)	7	27;28
sp|Q8IVE3|PKHH2_HUMAN	SRSGPGSPRAMK	Oxidation (M),2 Phospho (STY)	32	143;144
sp|Q8N2Y8|RUSC2_HUMAN	SRSYDRSLQR	2 Phospho (STY)		151;407
sp|Q9UMR7|CLC4A_HUMAN	SSGINTASSAASK	3 Phospho (STY)		236;237;238
sp|Q6NV74|CRCDL_HUMAN	STSLSLKYRDGASQEVK	3 Phospho (STY)		111;112;401
sp|A6NGK3|GAG10_HUMAN	STYRSRPR	2 Phospho (STY)		14;248
sp|P36406|TRI23_HUMAN	SWYIQGCDARSGMGLYEGLDWLSR	Oxidation (M),3 Phospho (STY)	17	56;57;58
sp|Q8WXI7|MUC16_HUMAN	TDGIMEHITKIPNEAAHR	Oxidation (M),2 Phospho (STY)		337;338
sp|Q96KC8|DNJC1_HUMAN	TELETLQKQKK	2 Phospho (STY)		349;350
sp|P35240|MERL_HUMAN	TFTVRIVTMDAEMEFNCEMK	Oxidation (M),2 Phospho (STY)	16	270;271
sp|O95873|CF047_HUMAN	TKDSGALRVSGAASEPSK	2 Phospho (STY)		41;257
sp|A2RUR9|C144A_HUMAN	TQMELTIKDLESEISR	Oxidation (M),3 Phospho (STY)	3	11;244;245
sp|Q86VM9|ZCH18_HUMAN	TSASSASASNSSRSSSR	6 Phospho (STY)		125;126;127;128;129;130;306
sp|Q8WZ42|TITIN_HUMAN	TSEMEASSSVREVKSQMTETR	Oxidation (M),6 Phospho (STY)	37	169;170;171;172;173;339;340;341
sp|A7MD48|SRRM4_HUMAN	TSSSSSSR	6 Phospho (STY)		18;19;20;21;22;249
sp|P40937|RFC5_HUMAN	TSTILACAKQLYKDK	2 Phospho (STY)		60;272;390
sp|A4D1E1|Z804B_HUMAN	TTEKDKSK	3 Phospho (STY)		12;246;247
sp|Q9Y2G7|ZFP30_HUMAN	TTSEKMPTYRK	3 Phospho (STY)		239;377;378
sp|O95644|NFAC1_HUMAN	VHVPQPSGRTLSLQVASNPIECSQR	4 Phospho (STY)		38;39;40;256
sp|Q8N715|CC185_HUMAN	VQDTNLSSLINYQAR	2 Phospho (STY)		153;408
sp|Q9Y2E5|MA2B2_HUMAN	VRDHHDFLPYSTEPFQAWTGFYTSR	Phospho (STY)		422
sp|P43351|RAD52_HUMAN	VSTPSAEKSEAAPPAPPVTHSTPVTVSEPLLEK	6 Phospho (STY)		61;62;63;273;274;275
sp|Q8NEM8|CBPC3_HUMAN	VTSLQSPMGKQTSTWTEK	4 Phospho (STY)		154;320;321;322
sp|Q86WI1|PKHL1_HUMAN	YAIYFSQTGLPEDKVR	3 Phospho (STY)		134
sp|Q8IV33|K0825_HUMAN	YDNLMKEMTKK	Oxidation (M),Phospho (STY)	31	405
sp|Q9ULW2|FZD10_HUMAN	YEIPAQSPTCV	2 Phospho (STY)		234;420
sp|P12270|TPR_HUMAN	YEMLQDNVEGYRREITSLHER	Phospho (STY)		386
sp|Q5SZK8|FREM2_HUMAN	YGPGHGLLQRR	Phospho (STY)		397
sp|Q9BX84|TRPM6_HUMAN	YIMTYHEKPWLPPPLILLSHVGLLLR	Oxidation (M),3 Phospho (STY)	41	197;361;417
sp|Q5CZC0|FSIP2_HUMAN	YLMSSDFNEMSTCIINK	Oxidation (M),2 Phospho (STY)	23	98;396
sp|Q5VWG9|TAF3_HUMAN	YPWKEFLK	Phospho (STY)		399
sp|O95936|EOMES_HUMAN	YSMDSLSSER	Oxidation (M),3 Phospho (STY)	11	42;43;384
